# Supplementary material for: Age at menarche and ischemic heart disease: An update mendelian randomization study
Source: Front Genet. 2022 Nov 3;13:942861. doi: 10.3389/fgene.2022.942861 (PMC9671358; doi:10.3389/fgene.2022.942861)
Supplement: Supplementary file 2 [file Table1.XLSX]

## Sheet: Table 1
Supplementary Table 1. Details of the data source.
Trait	Age when periods started (menarche)	Ischaemic heart disease, wide definition
ID	ukb-a-315	finn-b-I9_IHD
Year	2017	2021
Author	Neale	NA
Consortium	Neale Lab	NA
Sex	Males and Females	Males and Females
Population	European	European
Unit	SD	NA
No. SNP	10894596	16380466
Sample size	176008	218792
Build	HG19/GRCh37	HG19/GRCh37
Category	NA	Binary
No. case		31640
No. control		187152
Note	https://gwas.mrcieu.ac.uk/datasets/ukb-a-315/	https://gwas.mrcieu.ac.uk/datasets/finn-b-I9_IHD/
Abbreviations: ID, identity; SD, standard deviation; SNP, single nucleotide polymorphism; NA, not available.

## Sheet: Table 2
Supplementary Table 2. Associations of the included SNPs with age at menarche.
SNP	CHR	POS	EA	OA	EAF	β	SE	P	R^2 (%)	F
rs115260227	4	104774698	G	A	0.0115718	0.104555	0.0118966	1.52721e-18	0.047735	84.0567
rs146370649	3	51468766	G	C	0.0236744	0.0580699	0.00822806	1.70098e-12	0.0690034	121.534
rs59072247	2	73536689	T	C	0.0290066	0.0464699	0.00738006	3.04782e-10	0.0769261	135.499
rs7652234	3	24190459	G	C	0.0404242	0.0365899	0.00636473	9.00016e-09	0.0891867	157.114
rs62106258	2	417167	C	T	0.0484669	0.0565302	0.00574264	7.37904e-23	0.0988386	174.134
rs62376854	5	110569130	G	A	0.0582653	-0.030438	0.0053606	1.36417e-08	0.105875	186.544
rs77322567	4	104569676	A	C	0.0560648	0.0365193	0.0053551	9.1622e-12	0.105984	186.736
rs141344917	5	111134797	A	G	0.0626796	-0.0322386	0.00520436	5.85841e-10	0.10905	192.144
rs7852169	9	114318394	G	C	0.0826945	0.0485215	0.0045005	4.29932e-27	0.126084	222.195
rs12211649	6	100172277	A	G	0.0867307	0.0343701	0.00443181	8.85931e-15	0.128035	225.639
rs7300571	12	47857826	T	C	0.108461	0.025228	0.00398509	2.44799e-10	0.142367	250.933
rs7606180	2	209611106	A	T	0.109738	0.0268228	0.00395273	1.15718e-11	0.143531	252.987
rs78352137	14	100920416	C	T	0.110619	-0.0355898	0.00393652	1.56856e-19	0.144121	254.029
rs1981405	11	77976208	T	C	0.118967	0.023638	0.00382951	6.73271e-10	0.148143	261.127
rs6712986	2	25126046	C	T	0.121944	-0.0247223	0.00377976	6.13903e-11	0.15009	264.564
rs3767357	1	165403451	G	A	0.128565	-0.0380302	0.00370472	1.02589e-24	0.153125	269.923
rs12151356	19	36181046	C	T	0.13816	0.0244231	0.00358829	1.00438e-11	0.158086	278.681
rs114285994	16	19935763	A	G	0.138497	0.0226496	0.00358584	2.68355e-10	0.158194	278.872
rs11130329	3	52896855	A	C	0.858165	-0.0202973	0.00355258	1.10915e-08	0.159672	281.482
rs62520182	8	140646051	T	C	0.150091	0.0268566	0.00353715	3.14775e-14	0.160368	282.71
rs62379978	5	133915969	G	T	0.149793	0.0350187	0.00350179	1.54277e-23	0.161984	285.565
rs4351477	9	76953396	G	C	0.153991	0.0231056	0.00346183	2.49e-11	0.163851	288.861
rs2245213	1	14139683	C	A	0.844316	-0.0240481	0.00341772	1.98153e-12	0.165962	292.589
rs35005436	7	74134911	C	T	0.159146	-0.0212927	0.003387	3.25245e-10	0.167465	295.243
rs142058842	2	156621725	G	C	0.166497	0.0335895	0.0033217	4.9545e-24	0.170752	301.047
rs11893331	2	56577406	G	A	0.168429	0.034517	0.00330206	1.44212e-25	0.171766	302.838
rs720884	6	56877318	G	A	0.172659	-0.0209036	0.00327558	1.75618e-10	0.173152	305.286
rs6548237	2	621461	C	A	0.826979	-0.0296267	0.00327029	1.32556e-19	0.173431	305.78
rs61371450	11	16786905	A	G	0.175932	-0.0207878	0.003259	1.79188e-10	0.174031	306.839
rs12360772	11	1899962	A	G	0.188143	-0.0177775	0.0031854	2.39585e-08	0.178045	313.929
rs1362376	16	52291939	C	T	0.191635	-0.0213291	0.0031484	1.25141e-11	0.180134	317.618
rs3136247	2	48013099	G	A	0.193092	0.0186551	0.0031389	2.80053e-09	0.180678	318.579
rs4141153	7	41467946	G	A	0.195745	0.0256696	0.00311385	1.68112e-16	0.182129	321.142
rs17006627	2	61389609	C	G	0.200192	0.0217298	0.00310355	2.53922e-12	0.182732	322.208
rs16917237	11	27702383	T	G	0.203377	0.0202986	0.00307562	4.12762e-11	0.184388	325.134
rs9361178	6	77709928	G	C	0.203853	-0.0240124	0.00306974	5.21555e-15	0.184741	325.757
rs509325	1	177894591	G	T	0.208043	-0.028175	0.00305118	2.63148e-20	0.185863	327.738
rs66806308	20	46360465	T	C	0.213301	0.0171003	0.00305063	2.07974e-08	0.185896	327.797
rs2907557	10	117593801	G	A	0.210825	0.0168172	0.00304304	3.27258e-08	0.186359	328.615
rs6014657	20	54833431	A	C	0.221274	-0.0179089	0.00302449	3.19985e-09	0.1875	330.63
rs2046548	9	11807272	T	C	0.221009	-0.0185905	0.00298768	4.90704e-10	0.189805	334.704
rs34726119	8	54026145	T	C	0.221148	0.017204	0.00298235	8.007e-09	0.190144	335.302
rs1336794	1	102425278	A	C	0.232206	0.0177868	0.0029507	1.66334e-09	0.19218	338.899
rs6027163	20	37297776	A	G	0.23959	0.0171886	0.00290423	3.25544e-09	0.195249	344.321
rs7538038	1	204161026	G	A	0.245985	-0.016611	0.00287602	7.67591e-09	0.19716	347.699
rs852033	20	17085493	C	A	0.754262	0.016405	0.00287568	1.16694e-08	0.197183	347.74
rs947992	11	101485041	A	T	0.747266	0.0251908	0.0028504	9.86279e-19	0.198928	350.824
rs3849531	3	128058617	T	A	0.267883	0.0159431	0.00279639	1.1908e-08	0.202763	357.6
rs12607903	18	3817134	T	C	0.721451	-0.0206467	0.00276535	8.29087e-14	0.205034	361.614
rs2087876	4	28727547	A	T	0.717585	0.0166787	0.00275595	1.43437e-09	0.205732	362.847
rs10063744	5	95649772	G	C	0.284987	0.0164191	0.00275245	2.44698e-09	0.205993	363.309
rs9635759	17	49613785	A	G	0.302162	0.0295894	0.00274845	5.08745e-27	0.206292	363.837
rs17817628	17	53174727	G	A	0.287406	-0.0179919	0.00274041	5.20475e-11	0.206896	364.905
rs4735766	8	78099782	T	G	0.285453	-0.018113	0.00273879	3.76444e-11	0.207018	365.121
rs1172955	10	97877320	A	T	0.712558	-0.0266462	0.00273342	1.90064e-22	0.207424	365.838
rs1543633	1	38749491	G	C	0.297121	0.0155653	0.00271774	1.022e-08	0.208618	367.949
rs4660257	1	44148168	C	T	0.298539	-0.0184353	0.00270595	9.59622e-12	0.209526	369.552
rs7155448	14	60937851	C	T	0.697776	-0.0214917	0.00269574	1.56459e-15	0.210317	370.951
rs6576457	15	23809876	A	G	0.306334	-0.0210526	0.00269565	5.75705e-15	0.210324	370.964
rs10832013	11	13295353	T	G	0.696104	-0.0212298	0.00269204	3.13545e-15	0.210606	371.461
rs10794201	10	126846531	T	C	0.309297	0.0160221	0.00268872	2.54261e-09	0.210865	371.92
rs6451675	5	43110855	G	C	0.689267	-0.0153801	0.00268331	9.9552e-09	0.21129	372.67
rs62180179	2	199844791	C	A	0.310037	0.0271614	0.00268088	4.06537e-24	0.211481	373.008
rs193536	16	14394844	T	C	0.320577	0.024244	0.00267828	1.41677e-19	0.211686	373.37
rs10150677	14	93917392	G	C	0.688263	-0.0149495	0.00267513	2.29578e-08	0.211934	373.809
rs4738266	8	73455936	T	C	0.683392	0.0157488	0.00266836	3.597e-09	0.212471	374.758
rs1516883	9	108907267	A	G	0.316218	-0.0447331	0.00266749	4.54883e-63	0.21254	374.88
rs10948839	6	54533327	G	T	0.318276	-0.0172595	0.00266056	8.77001e-11	0.213092	375.856
rs3810291	19	47569003	A	G	0.677478	-0.0157655	0.00265116	2.74208e-09	0.213846	377.189
rs1933801	6	105365725	T	C	0.678076	-0.0599963	0.0026474	1.53462e-113	0.214149	377.725
rs730554	19	9961546	A	G	0.675944	0.0242551	0.00263964	4.01421e-20	0.214778	378.835
rs3743266	15	60781513	C	T	0.332973	-0.0223232	0.0026329	2.29721e-17	0.215326	379.805
rs61417237	6	84324159	A	G	0.331596	0.0161791	0.00263049	7.73624e-10	0.215523	380.153
rs7113874	11	8688016	T	C	0.342949	0.0208136	0.00261547	1.76076e-15	0.216758	382.336
rs4664605	2	153573528	T	C	0.649716	-0.0170266	0.0026115	7.05667e-11	0.217087	382.917
rs56283944	7	157983840	A	G	0.338815	0.0157709	0.00261095	1.54135e-09	0.217133	382.998
rs7955427	12	24564344	C	T	0.37751	0.0144401	0.00260079	2.82481e-08	0.217979	384.494
rs9594366	13	40368601	T	C	0.353263	0.0157937	0.00259966	1.24028e-09	0.218074	384.661
rs9849338	3	172126476	A	C	0.363589	-0.0147213	0.00259443	1.39573e-08	0.218512	385.437
rs2576733	2	105873233	C	T	0.577739	-0.0240746	0.00259306	1.64627e-20	0.218627	385.64
rs4818008	21	40611442	A	T	0.355093	-0.0210411	0.00258696	4.19566e-16	0.219142	386.55
rs72928140	2	199620460	C	A	0.363523	0.0207626	0.00258487	9.62277e-16	0.219319	386.862
rs61992671	14	101531854	G	A	0.495639	0.0165509	0.0025835	1.49389e-10	0.219435	387.067
rs8180892	8	3765324	T	C	0.637871	-0.0143611	0.00258234	2.68188e-08	0.219533	387.241
rs11123597	2	4940342	A	G	0.366533	0.0143453	0.00257612	2.57199e-08	0.220062	388.176
rs771917	9	1629673	G	C	0.625303	-0.0153631	0.00256408	2.08089e-09	0.221093	389.999
rs2764261	6	108927842	G	A	0.627119	-0.0164862	0.00256079	1.21431e-10	0.221376	390.5
rs561821	15	41427864	T	C	0.377513	-0.0179061	0.00255854	2.59537e-12	0.221571	390.843
rs7623273	3	86806429	C	T	0.379774	-0.021599	0.00255739	3.04439e-17	0.22167	391.019
rs4242497	8	4834787	A	G	0.373234	-0.0157565	0.00255491	6.96819e-10	0.221885	391.399
rs4755720	11	43628749	T	C	0.608267	0.0164539	0.00254518	1.01742e-10	0.222731	392.895
rs1899689	7	121964349	T	C	0.387322	0.0140542	0.00254458	3.33396e-08	0.222783	392.988
rs752278	15	89037134	A	G	0.420836	-0.0188038	0.00253704	1.25256e-13	0.223444	394.156
rs1553002	6	151799355	T	A	0.391423	-0.0147599	0.00253517	5.82237e-09	0.223608	394.446
rs10090153	8	77784096	G	A	0.601768	0.0156529	0.00252848	6.00579e-10	0.224199	395.49
rs1421085	16	53800954	C	T	0.40212	-0.0327571	0.00252436	1.7342e-38	0.224564	396.136
rs59360790	11	47669175	C	T	0.403945	-0.0155779	0.00252199	6.55405e-10	0.224774	396.508
rs2917677	16	69750849	T	C	0.41082	0.0251861	0.00252193	1.76563e-23	0.22478	396.517
rs2428493	6	31329135	A	C	0.409175	0.0176089	0.0025195	2.77715e-12	0.224996	396.9
rs2297605	9	127255448	A	G	0.459728	0.0177949	0.00251277	1.42824e-12	0.225597	397.963
rs3828002	20	19702049	A	G	0.548577	0.0143158	0.00250889	1.15832e-08	0.225945	398.578
rs13130484	4	45175691	T	C	0.433372	-0.0178334	0.00250866	1.17544e-12	0.225966	398.615
rs2300922	3	185651469	T	C	0.426532	0.0171636	0.00250684	7.58228e-12	0.22613	398.904
rs61779780	1	65931394	C	G	0.422719	0.0161544	0.00250349	1.10123e-10	0.226432	399.438
rs7853970	9	86715566	C	T	0.533897	-0.0215808	0.00250343	6.71893e-18	0.226437	399.447
rs2798224	4	3267668	A	G	0.570923	0.013792	0.00250309	3.59352e-08	0.226468	399.502
rs9322076	6	100952020	T	C	0.550521	-0.0170587	0.00250229	9.31322e-12	0.22654	399.629
rs7553348	1	75005067	A	G	0.562315	0.0270074	0.00249904	3.24863e-27	0.226834	400.149
rs12550650	8	4550990	T	C	0.450523	0.0174414	0.00249564	2.78356e-12	0.227142	400.694
rs1167796	7	75173180	G	A	0.564389	-0.0136766	0.00249472	4.20639e-08	0.227226	400.842
rs2167378	2	200045258	T	C	0.436806	-0.0187541	0.00249356	5.46135e-14	0.227331	401.029
rs12891481	14	78426863	T	C	0.485323	-0.0139471	0.00249335	2.22577e-08	0.22735	401.062
rs11605693	11	122837037	C	T	0.554168	0.0298897	0.00249314	4.19083e-33	0.22737	401.096
rs2422137	1	72619961	A	C	0.451717	-0.0147852	0.00249141	2.95318e-09	0.227527	401.375
rs11668832	19	1812682	G	A	0.548608	0.0165728	0.00248927	2.78997e-11	0.227722	401.72
rs12716975	16	29950829	T	C	0.552181	-0.0148583	0.00248923	2.39144e-09	0.227726	401.726
rs9349203	6	41893323	A	G	0.549468	-0.0159574	0.0024876	1.4139e-10	0.227875	401.989
rs9398808	6	126758791	T	G	0.454377	-0.020593	0.00248652	1.22096e-16	0.227974	402.164
rs6747911	2	142314952	T	G	0.540294	0.0144427	0.00248647	6.31335e-09	0.227978	402.172
rs9956387	18	44773382	T	A	0.50368	0.0254608	0.00248422	1.21479e-24	0.228184	402.536
rs5742915	15	74336633	C	T	0.461723	0.0154026	0.00248209	5.46437e-10	0.228379	402.882
rs2582924	6	147592611	A	G	0.473338	-0.0143198	0.00248124	7.88243e-09	0.228458	403.02
rs7433864	3	117593483	A	C	0.504368	0.0227719	0.00247645	3.77572e-20	0.228898	403.799
rs913588	9	7174673	A	G	0.519923	-0.0186343	0.00247572	5.22396e-14	0.228966	403.918
rs1874984	10	1731871	C	G	0.489374	0.017007	0.00247365	6.20869e-12	0.229157	404.256
Abbreviations: SNP, single nucleotide polymorphism; CHR, chromosome Location; POS, position; EA, effect allele; OA, other allele; EAF, effect allele frequency; SE, standard error; β, beta; P, p-value; F, F-statistic.

## Sheet: Table 3
Supplementary Table 3. Information of rs56283944 in outcome data.
SNP	EA.AAM	OA.AAM	EA.IHD	OA.IHD	β.IHD	EAF.IHD	SE.IHD	P.IHD
rs56283944	A	G	A	G	-0.007	0.258	0.013	0.595
rs56283944	A	G	G	C	0.185	0.002	0.15	0.218
Abbreviations: SNP, single nucleotide polymorphism; EA, effect allele；OA，other allele ;AAM，age at menarche；IHD, ischemic heart disease ; EAF, effect allele frequency; SE, standard error.

## Sheet: Table 4
Supplementary Table 4. Associations between 117 SNPs and IHD
SNP	β	SE	p-Value
rs10063744	0.462876	0.688223	0.501223
rs10090153	-0.281098	0.715522	0.694425
rs10150677	-1.25088	0.769256	0.103931
rs10794201	-0.724	0.773931	0.349539
rs10832013	-2.20916	0.560533	8.10829e-05
rs10948839	0.115878	0.6663	0.861934
rs11123597	-0.822569	0.787714	0.296371
rs11130329	-2.21704	0.906525	0.014459
rs114285994	1.06404	0.847697	0.209403
rs11605693	0.036802	0.374711	0.921762
rs11668832	1.29127	0.669772	0.0538641
rs1172955	0.457851	0.465357	0.325179
rs11893331	-0.25205	0.36214	0.486429
rs12151356	-0.106457	0.618267	0.863292
rs12211649	-0.544078	0.599358	0.364001
rs12360772	-0.241879	0.787512	0.758735
rs12550650	-0.223606	0.636417	0.725325
rs12607903	-0.435905	0.566677	0.441756
rs12716975	-0.612452	0.740327	0.408082
rs12891481	0.695485	0.803034	0.386451
rs13130484	-1.55887	0.61682	0.0114952
rs1336794	-0.427283	0.669035	0.523047
rs1362376	0.30006	0.670446	0.654476
rs141344917	-1.1663	0.8282	0.15906
rs142058842	-0.282826	0.476339	0.552679
rs1421085	-0.821196	0.338858	0.015375
rs146370649	0.70949	0.780094	0.36309
rs1516883	0.0782418	0.261551	0.764829
rs1543633	-1.52262	0.783795	0.0520617
rs1553002	-0.955291	0.765588	0.212109
rs16917237	0.0147793	0.724188	0.983718
rs17006627	-0.980221	0.625869	0.117307
rs17817628	-1.38951	0.672525	0.0388176
rs1899689	-0.0142306	0.796915	0.985753
rs1933801	-0.315019	0.198346	0.112233
rs193536	0.453721	0.474344	0.338809
rs2046548	-0.634733	0.785347	0.418964
rs2087876	-0.269805	0.731472	0.712238
rs2167378	-0.335927	0.602535	0.577171
rs2245213	-0.906517	0.569692	0.111555
rs2297605	0.101153	0.623774	0.871178
rs2300922	-0.29714	0.65837	0.651754
rs2422137	-0.439629	0.743987	0.554581
rs2428493	0.249874	0.681474	0.713868
rs2576733	-1.05921	0.465221	0.022799
rs2582924	-0.0279334	0.768167	0.970992
rs2764261	-0.740013	0.67329	0.271725
rs2798224	-0.12326	0.841067	0.883486
rs2907557	-0.0713555	0.80275	0.92917
rs2917677	-0.508217	0.440719	0.248848
rs3136247	-1.27043	0.900558	0.158329
rs34726119	0.168565	0.837015	0.840395
rs35005436	-0.441466	0.826574	0.593279
rs3743266	-0.161267	0.586833	0.783463
rs3767357	0.878249	0.41283	0.0333878
rs3810291	-1.30031	0.723098	0.0721381
rs3828002	0.146691	0.775367	0.849945
rs3849531	-1.28582	0.746404	0.0849448
rs4141153	-0.728488	0.498644	0.144033
rs4242497	-0.374449	0.729858	0.607921
rs4351477	0.095215	0.701129	0.891977
rs4660257	-0.0650925	0.634652	0.918309
rs4664605	-0.651921	0.751765	0.385839
rs4735766	0.480318	0.734279	0.513025
rs4738266	-0.171442	0.774662	0.82485
rs4755720	-1.06358	0.692845	0.124762
rs509325	0.0780834	0.511091	0.878574
rs561821	-1.08901	0.675747	0.107055
rs56283944	-0.424833	0.79894	0.594902
rs5742915	-1.85034	0.72715	0.010939
rs59072247	-1.77319	1.24382	0.153982
rs59360790	1.05277	0.744645	0.157423
rs6014657	-0.591884	0.742648	0.425455
rs6027163	-0.255984	0.715591	0.72055
rs61371450	-0.572451	0.957292	0.549847
rs61417237	0.648985	0.741698	0.381574
rs61992671	-1.06339	0.6767	0.116083
rs62106258	-0.0636828	0.695204	0.927013
rs62180179	-0.353443	0.416032	0.395571
rs62376854	0.58151	0.762205	0.445505
rs62379978	0.157059	0.385508	0.683709
rs62520182	-1.01279	0.487776	0.0378629
rs6548237	-0.610935	0.502925	0.224456
rs6576457	0.451251	0.555751	0.416811
rs66806308	0.54385	1.00583	0.588716
rs6712986	-1.60179	0.946514	0.0905873
rs6747911	-0.913957	0.768554	0.234365
rs7113874	0.663028	0.552523	0.230139
rs7155448	0.460643	0.632802	0.46665
rs720884	0.392277	0.669741	0.558068
rs72928140	0.582779	0.539431	0.279983
rs7300571	1.09799	0.74124	0.138531
rs730554	-1.18326	0.47825	0.0133558
rs7433864	0.333745	0.491834	0.497409
rs752278	-0.845574	0.622215	0.174155
rs7538038	0.0481609	0.800674	0.952036
rs7553348	0.211053	0.407296	0.604331
rs7606180	0.995422	0.663615	0.133614
rs7623273	-0.0740775	0.523172	0.887402
rs7652234	-0.0327959	0.598526	0.956302
rs771917	-1.26277	0.80062	0.114741
rs77322567	0.501105	0.832437	0.547192
rs78352137	1.36556	0.587247	0.0200528
rs7852169	-0.791402	0.434859	0.0687734
rs7853970	-1.0843	0.509712	0.0333974
rs7955427	-0.588639	0.789468	0.455901
rs8180892	0.0487428	0.807738	0.951881
rs852033	0.0914355	0.792441	0.90814
rs913588	-0.101963	0.590309	0.862866
rs9322076	0.170001	0.656556	0.79569
rs9349203	-1.15934	0.695602	0.0955807
rs9361178	2.01979	0.616348	0.00104906
rs9398808	0.52445	0.539018	0.330567
rs947992	-0.13894	0.496213	0.779478
rs9594366	-0.227939	0.73447	0.756299
rs9635759	-0.239951	0.398791	0.547377
rs9849338	0.550223	0.767595	0.473489
All - IVW(fe)	-0.229302	0.0538547	＜0.001
All - IVW(mre)	-0.229302	0.0633571	＜0.001
All - WM	-0.241397	0.0876756	0.00589981
All - MR-Egger	0.018682	0.186415	0.920346
Abbreviations: SNP, single nucleotide polymorphism; SE, standard error; β, beta; P, p-value;MR, Mendelian Randomization; IVW(fe), fixed-inverse variance weighting; IVM(mre), mre-IVM, multiplicative random-effects inverse variance weighting; WM, weighted median

## Sheet: Table 5
Supplementary Table 5. Multivariable MR Associations of AAM with IHD and its subtypes adjusted for BMI(adult), BMI(childhood), BS.
Model	OR（95%CI）	P-value
IVW adjusted for BMI(adult)	0.86(0.74,1.00)	0.0448748
IVW adjusted for BMI(childhood)	0.83(0.72,0.96)	0.0100391
IVW adjusted for BS	0.80(0.71,0.92)	0.000715
IVW adjusted for above factors	0.84(0.72,0.99)	0.0324533
Abbreviations: OR, odds ratio; CI, confidence interval; IVW, inverse variance-weighted; BMI, Body Mass Index; Biological Sex.
